# Supplementary material for: Self-passivation leads to semiconducting edges of black phosphorene
Source: Royal Society of Chemistry journal article supplement (doi:10.1039/d0nh00506a), 2020-12-14
Supplement: d0nh00506a2.pdf [file d0nh00506a2.pdf]

# Self-passivation leads to semiconducting edges of black phosphorene

Li Ping Ding<sup>ab</sup> and Feng Ding<sup>\*ac</sup>

<sup>a</sup>Center for Multidimensional Carbon Materials, Institute for Basic Science (IBS), Ulsan 44919, Republic of Korea. E-mail: f.ding@unist.ac.kr

<sup>b</sup>Department of Optoelectronic Science & Technology, School of Electronic Information and Artificial Intelligence, Shaanxi University of Science & Technology, Xi'an 710021, China.

<sup>c</sup>Department of Materials Science and Engineering, Ulsan National Institute of Science and Technology (UNIST), Ulsan 44919, Republic of Korea.

## Outline

| Title                                                                                                                                                                                                                                                                                                                                                                                                                                                                                             | Page |
|---------------------------------------------------------------------------------------------------------------------------------------------------------------------------------------------------------------------------------------------------------------------------------------------------------------------------------------------------------------------------------------------------------------------------------------------------------------------------------------------------|------|
| <b>Table S1</b> The edge formation energies for the most stable edge reconstructed structures and pristine edged structures based on three different methods. The unit of energy is eV/Å                                                                                                                                                                                                                                                                                                          | 2    |
| <b>Fig. S1</b> The top and side views of the other low-lying structures of AC, ZZ and ZZ1 reconstructed edges together with their edge formation energies. The different structures are labeled f-m according to their edge formation energies from low to high.                                                                                                                                                                                                                                  | 2    |
| <b>Fig. S2</b> Residual strain versus the inverse width of BP ribbons for edge reconstructed AC-I, ZZ-I, ZZ1-I (solid lines) and AC, ZZ without considered edge reconstruction (short dot lines).                                                                                                                                                                                                                                                                                                 | 3    |
| <b>Fig. S3</b> Phase separations and energy profiles of BP nanoribbons with edge reconstruction (a) AC-I, (b) ZZ-I and (c) ZZ1-I during MD simulations.                                                                                                                                                                                                                                                                                                                                           | 3    |
| <b>Fig. S4</b> (a-c) The band structures of AC-I, ZZ-I and ZZ1-I black phosphorene nanoribbons (BPNRs) with edge reconstructions based on PBE method. (d-f) The band structures of AC, ZZ and ZZ1 PNRs without considering edge reconstructions based on PBE method.                                                                                                                                                                                                                              | 4    |
| <b>Fig. S5</b> (a) A typical dI/dV spectrum measured by Meunier <i>et al.</i> A series of peaks (labeled as P1 to P4) near the negative gap edge. (b) A series of dI/dV spectra measured along the “x” direction across the step edge.                                                                                                                                                                                                                                                            | 5    |
| <b>Fig. S6</b> The band gaps of BPNR structures with (a) AC-I, (b) ZZ-I and (c) ZZ1-I edge reconstruction as the function of nanoribbon width. The definition of the BPNR width is also shown in (a), (b) and (c) respectively. The black dashed line shows experimental values of mono-layer BP.                                                                                                                                                                                                 | 6    |
| <b>Fig. S7</b> The band structures and band decomposed charge densities of black phosphorene nanoribbons (BPNRs) with pristine AC (a), ZZ (b) and ZZ1 (c) edges. These BPNRs are saturated by hydrogen atoms on one side. The bands corresponding to 2D phosphorene’s valence band maximum and conduction minimum are denoted as 2D-VBM and 2D-CBM, respectively. Edge states around Fermi level are also labeled. (d-f) The corresponding density of states (DOSs) for BPNRs with various edges. | 7    |

**Table S1** The edge formation energies for the most stable edge reconstructed structures and pristine edged structures based on three different methods. The unit of energy is eV

| Structures |                            | $E_{\text{edge-f}} \text{ (eV/\AA)}$ |        |        |
|------------|----------------------------|--------------------------------------|--------|--------|
|            |                            | DFT                                  | DFT+D3 | DFT+D2 |
| AC         | AC-I                       | 0.202                                | 0.276  | 0.292  |
|            | Pristine                   | 0.242                                | 0.302  | 0.312  |
|            | $\Delta E_{\text{edge-f}}$ | 0.040                                | 0.026  | 0.020  |
| ZZ         | ZZ-I                       | 0.131                                | 0.156  | 0.169  |
|            | Pristine                   | 0.435                                | 0.280  | 0.308  |
|            | $\Delta E_{\text{edge-f}}$ | 0.304                                | 0.124  | 0.139  |
| ZZ1        | ZZ1-I                      | 0.163                                | 0.221  | 0.241  |
|            | Pristine                   | 0.383                                | 0.460  | 0.465  |
|            | $\Delta E_{\text{edge-f}}$ | 0.220                                | 0.239  | 0.224  |

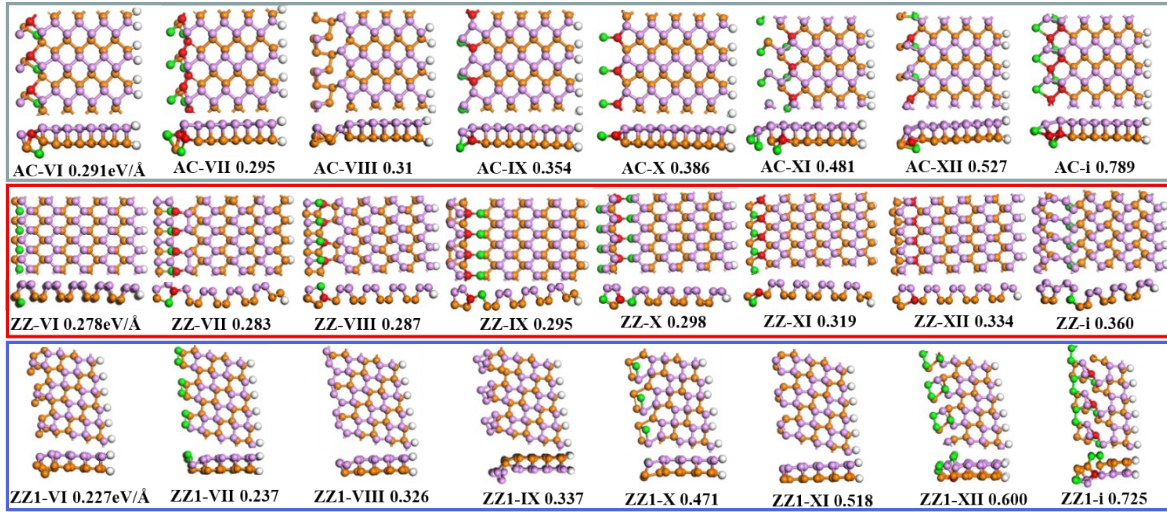

**Fig. S1** The top and side views of the other low-lying structures of AC, ZZ and ZZ1 reconstructed edges together with their edge formation energies (unit in eV/Å). The different structures are labeled f-m according to their edge formation energies from low to high. The orange spheres, pink spheres, red spheres, green spheres and gray spheres represent the lower level phosphorus atoms, the upper level phosphorus atoms, the phosphorus atom has four  $sp^3$  bonds, the phosphorus atom has two  $sp^3$  bonds and the hydrogen atoms, respectively.

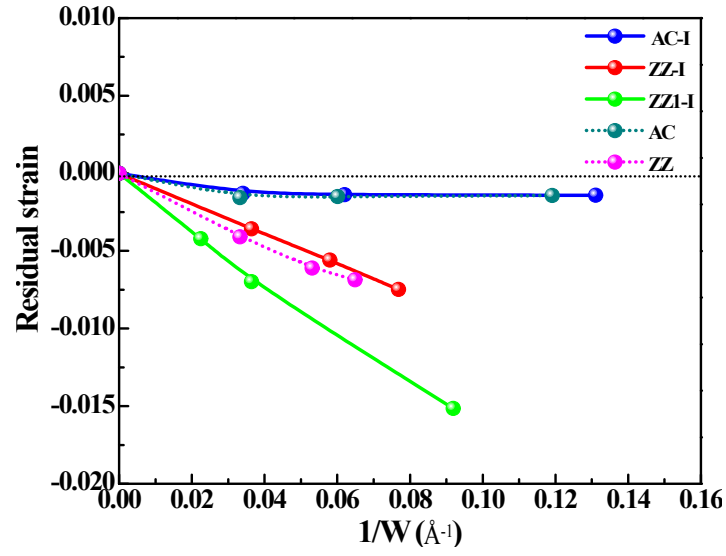

**Fig. S2** Residual strains versus the inverse width of the BP ribbons for edge reconstructed AC-I, ZZ-I, ZZ1-I structures (solid lines) and pristine AC, ZZ structures (short dot lines).

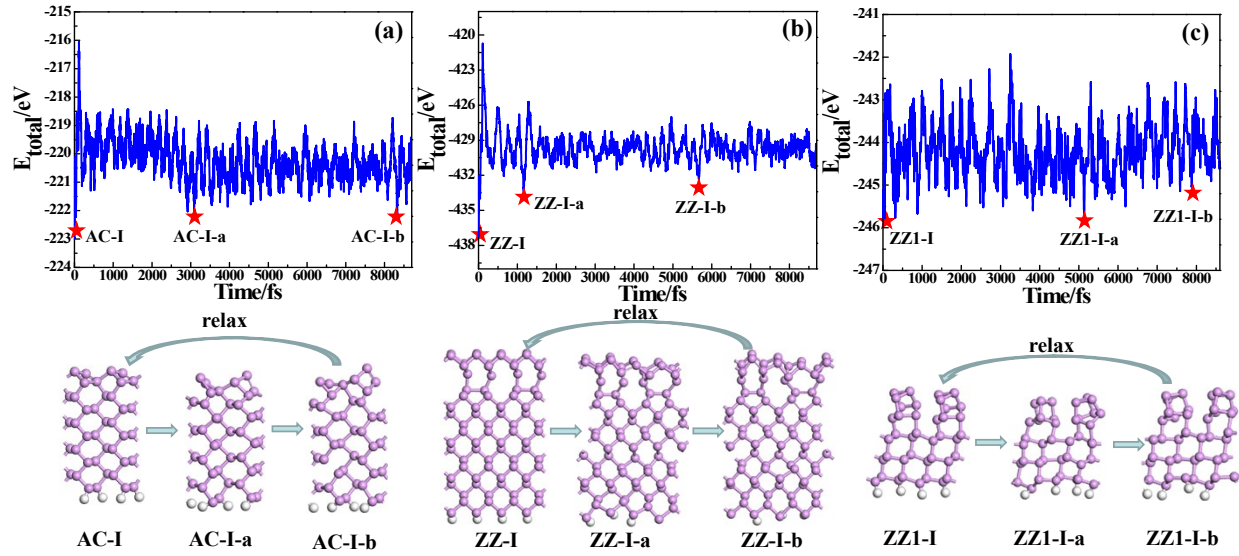

**Fig. S3** Phase separations and energy profiles of BP nanoribbons with edge reconstruction (a) AC-I, (b) ZZ-I and (c) ZZ1-I during MD simulations.

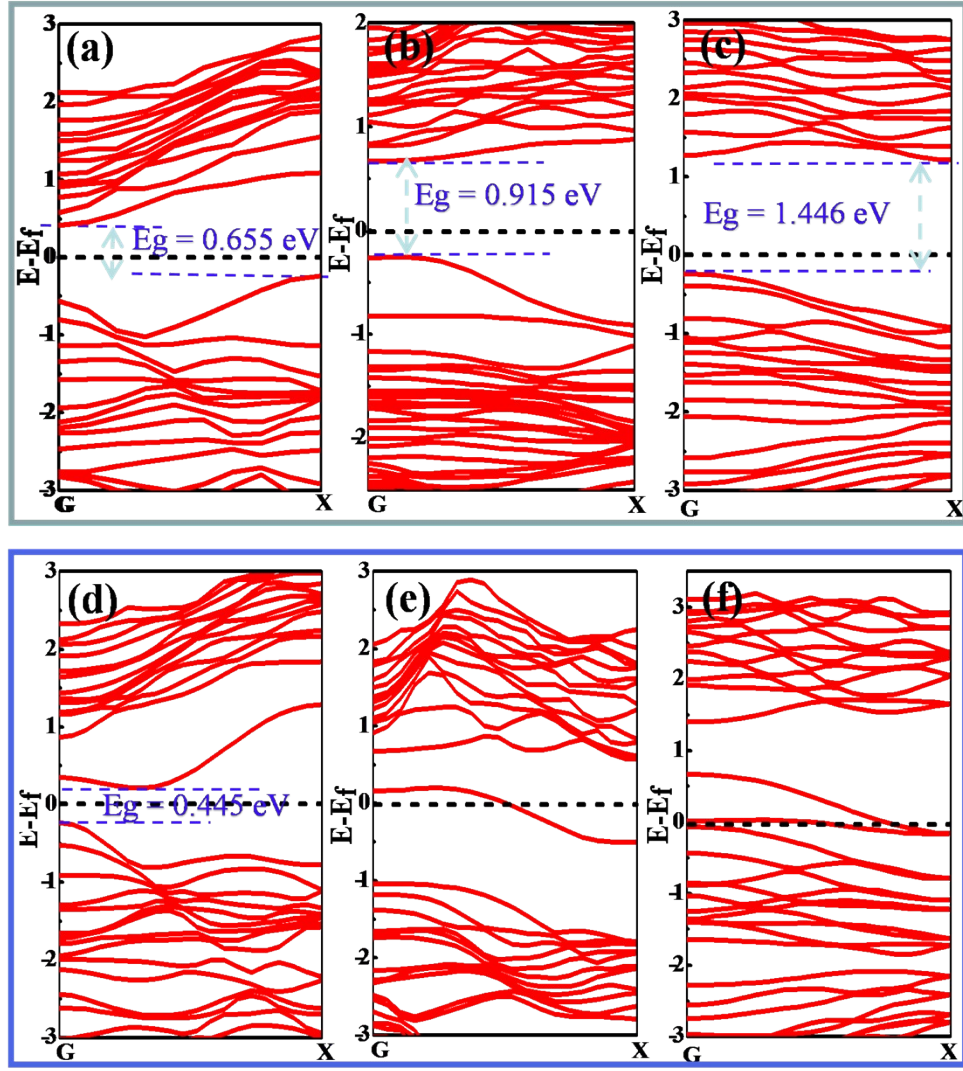

**Fig. S4** (a-c) The band structures of AC-I, ZZ-I and ZZ1-I black phosphorene nanoribbons (BPNRs) with edge reconstructions based on PBE method. (d-f) The band structures of AC, ZZ and ZZ1 PNRs without considering edge reconstructions based on PBE method. The Fermi level is set at 0 eV.

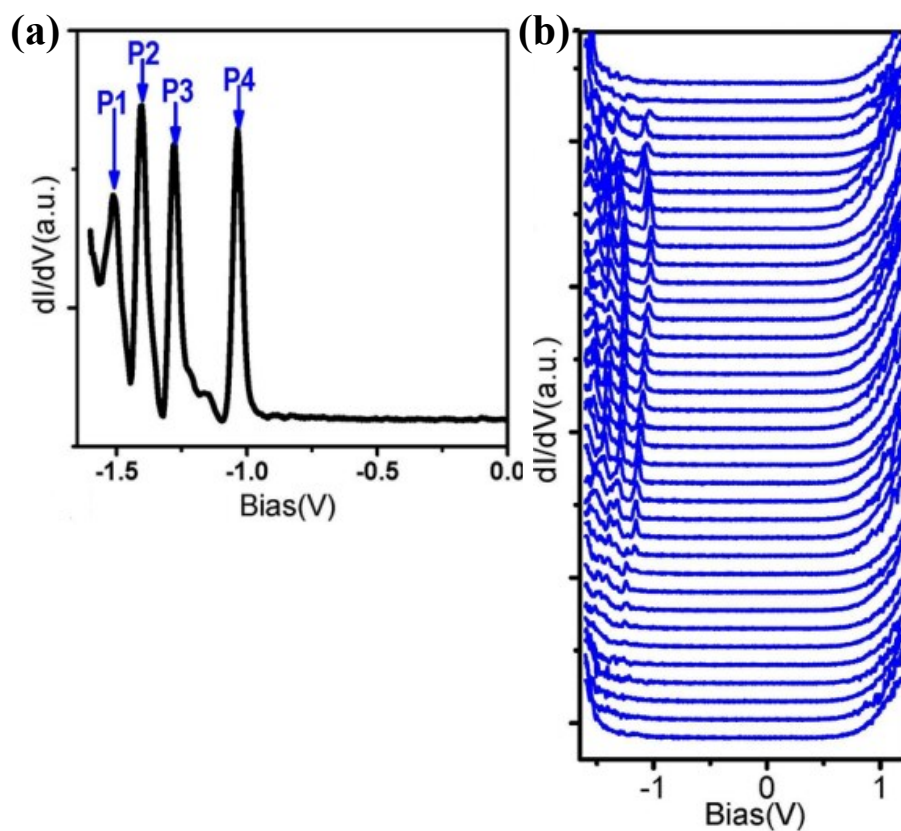

**Fig. S5** (a) A typical  $dI/dV$  spectrum measured by Meunier *et al.* A series of peaks (labeled as P1 to P4) near the negative gap edge. (b) A series of  $dI/dV$  spectra measured along the “x” direction across the step edge. Adopted with permission. Copyright 2014, American Chemical Society.

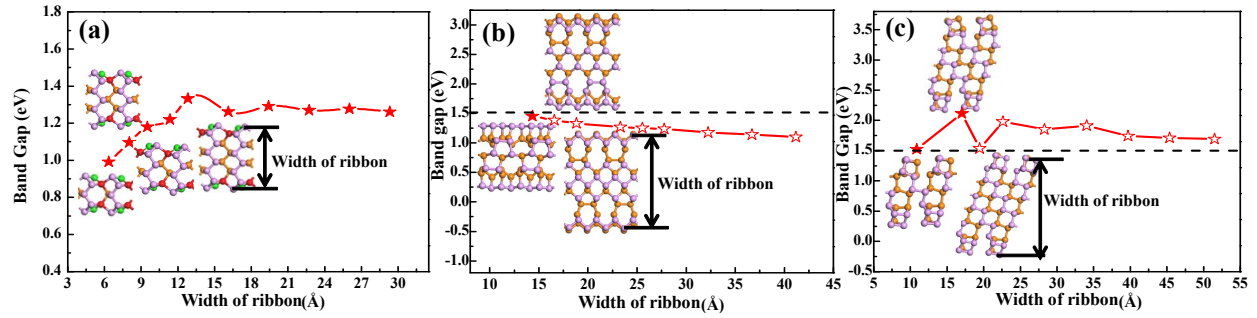

**Fig. S6** The band gaps of BPNR structures with (a) AC-I, (b) ZZ-I and (c) ZZ1-I edge reconstruction as the function of nanoribbon width. The definition of the PNR width is also shown in (a), (b) and (c) respectively. The black dashed line shows experimental values of mono-layer BP. The orange spheres, the pink spheres, the red sphere and the green spheres indicate the lower level phosphorus atoms, the upper level atoms, and the phosphorus atoms which has four  $sp^3$  bonds and two  $sp^3$  bonds, respectively. Solid and empty star symbols indicate indirect and direct band gaps, respectively.

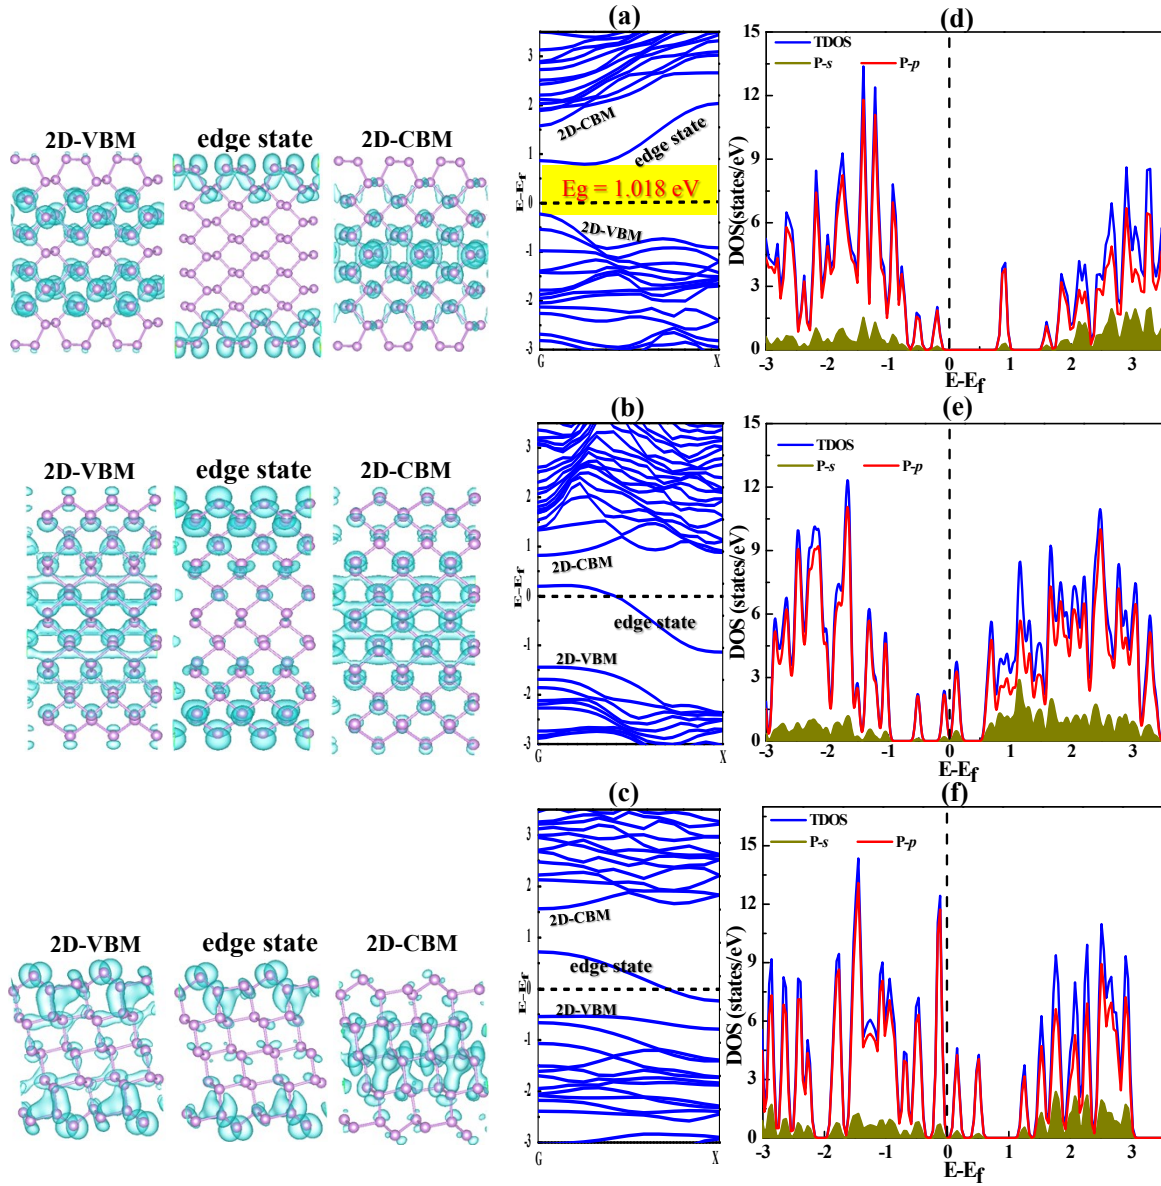

**Fig. S7** The band structures and band decomposed charge densities of black phosphorene nanoribbons (BPNRs) with pristine AC (a), ZZ (b) and ZZ1 (c) edges. These BPNRs are saturated by hydrogen atoms on one side. The bands corresponding to 2D phosphorene's valence band maximum and conduction minimum are denoted as 2D-VBM and 2D-CBM, respectively. Edge states around Fermi level are also labeled. (d-f) The corresponding density of states (DOSs) for PNRs with various edges. The Fermi level is set at 0 eV.
